# Supplementary material
Source: PubMed Central journal article supplement (PMC3564578)
Supplement: NIHMS434707-supplement-1_si_001.pdf [file NIHMS434707-supplement-1_si_001.pdf]

## **Supporting Information**

### **Quantum Chemical Calculations of Amide-<sup>15</sup>N Chemical Shift Anisotropy Tensors for a Membrane-Bound Cytochrome b<sub>5</sub>**

Manoj Kumar Pandey and Ayyalusamy Ramamoorthy\*

Biophysics and Department of Chemistry, The University of Michigan, Ann  
Arbor, MI 48109-1055

\*To whom correspondence should be addressed (ramamoor@umich.edu)

**Table S1.** The variation of the principal components of backbone amide-<sup>15</sup>N CSA tensors in ppm are tabulated with distance from backbone amide-<sup>15</sup>N of interest for few residues of cytb<sub>5</sub>. Calculated isotropic chemical shift ( $\delta_{\text{iso}}$ ) represents the average of three principal components [ $\delta_{\text{iso}} = (\delta_{11} + \delta_{22} + \delta_{33})/3$ ]; CSA ( $\Delta\delta$ ) is determined using the relation  $\Delta\delta = \delta_{11} - 0.5 \times (\delta_{22} + \delta_{33})$ .

| Residue | Distance | $\delta_{11}$ | $\delta_{22}$ | $\delta_{33}$ | $\delta_{\text{iso}}$ | CSA ( $\Delta\delta$ ) | $\delta_{11} - \delta_{33}$ |
|---------|----------|---------------|---------------|---------------|-----------------------|------------------------|-----------------------------|
| K19     | 4Å       | 239.9         | 91.3          | 50.1          | 127.1                 | 169.2                  | 189.8                       |
|         | 5 Å      | 236.2         | 91.1          | 48.6          | 125.3                 | 166.4                  | 187.7                       |
|         | 6Å       | 234.2         | 91.9          | 46.9          | 124.3                 | 164.8                  | 187.2                       |
| T60     | 4Å       | 253.1         | 73.4          | 73.3          | 133.3                 | 179.7                  | 179.8                       |
|         | 5Å       | 251.2         | 73.3          | 72.9          | 132.5                 | 178.1                  | 178.3                       |
|         | 6Å       | 252.3         | 73.0          | 72.6          | 132.6                 | 179.5                  | 179.7                       |
| N62     | 4Å       | 229.4         | 97.4          | 57.2          | 128.0                 | 152.2                  | 172.2                       |
|         | 5Å       | 227.9         | 99.7          | 54.4          | 127.3                 | 150.9                  | 173.6                       |
|         | 6Å       | 228.9         | 96.6          | 60.0          | 128.5                 | 150.6                  | 168.9                       |
|         | 8Å       | 229.1         | 97.8          | 65.9          | 130.9                 | 147.2                  | 163.2                       |
| E64     | 4Å       | 232.8         | 74.4          | 57.1          | 121.5                 | 167.1                  | 175.7                       |
|         | 5Å       | 232.9         | 74.2          | 57.6          | 121.6                 | 167.0                  | 175.3                       |
|         | 6Å       | 233.5         | 73.5          | 58.1          | 121.7                 | 167.7                  | 175.3                       |
| D71     | 4Å       | 253.7         | 80.2          | 54.1          | 129.3                 | 186.5                  | 199.6                       |
|         | 5Å       | 245.2         | 82.3          | 49.3          | 125.6                 | 179.4                  | 195.9                       |
|         | 6Å       | 244.8         | 82.2          | 48.9          | 125.3                 | 179.3                  | 195.9                       |
|         | 8Å       | 246.7         | 80.7          | 53.9          | 127.1                 | 179.4                  | 192.8                       |

**Table S2.** Backbone amide-<sup>15</sup>N CSA principal components ( $\delta_{11}$ ,  $\delta_{22}$  and  $\delta_{33}$  in ppm) obtained from quantum chemical calculations for residues of cytb<sub>5</sub>. The calculations were performed by taking residues within 5Å distance from the residue of interest. Asymmetry parameter ( $\eta$ ) is given by the relation  $\eta = (\delta_{22} - \delta_{33}) / (\delta_{11} - \delta_{iso})$ .

| Residue | $\delta_{11}$ | $\delta_{22}$ | $\delta_{33}$ | Calc<br>$\delta_{iso}$ | Expt<br>$\delta_{iso}$ | CSA<br>$\Delta\delta$ | span ( $\Omega$ )<br>$=\delta_{11}-\delta_{33}$ | $\eta$ |
|---------|---------------|---------------|---------------|------------------------|------------------------|-----------------------|-------------------------------------------------|--------|
| K10     | 232.4         | 99.5          | 49.3          | 127.1                  | 127.3                  | 158.0                 | 183.1                                           | 0.48   |
| Y11     | 217.9         | 111.2         | 37.7          | 122.3                  | 121.9                  | 143.5                 | 180.2                                           | 0.77   |
| Y12     | 229.7         | 91.5          | 58.7          | 126.6                  | 118.3                  | 154.6                 | 171.0                                           | 0.32   |
| T13     | 220.9         | 78.1          | 40.1          | 113.0                  | 115.5                  | 161.8                 | 180.8                                           | 0.35   |
| L14     | 248.2         | 104.1         | 50.5          | 134.3                  | 123.4                  | 170.9                 | 197.7                                           | 0.47   |
| E15     | 242.7         | 84.7          | 64.8          | 130.7                  | 116.8                  | 168.0                 | 177.9                                           | 0.18   |
| E16     | 230.5         | 76.0          | 45.2          | 117.2                  | 118.9                  | 169.9                 | 185.3                                           | 0.27   |
| I17     | 215.9         | 73.5          | 50.0          | 113.1                  | 121.2                  | 154.2                 | 165.9                                           | 0.23   |
| K18     | 236.7         | 77.1          | 51.3          | 121.7                  | 116.5                  | 172.5                 | 185.3                                           | 0.23   |
| K19     | 236.2         | 91.1          | 48.6          | 125.3                  | 114.3                  | 166.4                 | 187.7                                           | 0.41   |
| H20     | 230.7         | 77.4          | 58.6          | 122.3                  | 121.8                  | 162.7                 | 172.1                                           | 0.17   |
| N21     | 233.7         | 77.0          | 68.9          | 126.5                  | 118.2                  | 160.7                 | 164.8                                           | 0.08   |
| H22     | 203.5         | 100.1         | 58.8          | 120.8                  | 117.5                  | 124.1                 | 144.7                                           | 0.50   |
| K24     | 205.7         | 77.0          | 49.8          | 110.8                  | 118.4                  | 142.3                 | 156.0                                           | 0.29   |
| S25     | 226.4         | 81.0          | 47.6          | 118.3                  | 115.5                  | 162.1                 | 178.9                                           | 0.31   |
| T26     | 229.1         | 76.7          | 58.0          | 121.3                  | 125.3                  | 161.8                 | 171.1                                           | 0.17   |
| W27     | 242.3         | 97.1          | 59.4          | 132.9                  | 127.1                  | 164.0                 | 182.8                                           | 0.34   |
| L28     | 227.1         | 79.0          | 41.7          | 115.9                  | 116.2                  | 166.8                 | 185.5                                           | 0.34   |

|     |       |      |      |       |       |       |       |      |
|-----|-------|------|------|-------|-------|-------|-------|------|
| I29 | 253.7 | 78.5 | 58.8 | 130.3 | 120.8 | 185.1 | 194.9 | 0.16 |
| L30 | 244.8 | 85.9 | 66.1 | 132.2 | 121.9 | 168.8 | 178.7 | 0.18 |
| H31 | 223.3 | 82.9 | 65.8 | 124.0 | 125.8 | 149.0 | 157.5 | 0.17 |
| K33 | 244.3 | 80.0 | 64.0 | 129.4 | 121.9 | 172.3 | 180.3 | 0.14 |
| V34 | 234.8 | 85.4 | 54.7 | 125.0 | 120.8 | 164.7 | 180.1 | 0.28 |
| Y35 | 235.5 | 91.5 | 48.0 | 125.0 | 126.5 | 165.7 | 187.4 | 0.39 |
| D36 | 228.9 | 84.5 | 61.4 | 124.9 | 119.6 | 156.0 | 167.5 | 0.22 |
| L37 | 231.5 | 99.6 | 67.1 | 132.7 | 122.9 | 148.1 | 164.4 | 0.33 |
| T38 | 236.7 | 71.1 | 58.3 | 122.0 | 119.4 | 172.0 | 178.3 | 0.11 |
| K39 | 233.5 | 74.0 | 52.5 | 120.0 | 117.5 | 170.3 | 181.0 | 0.19 |
| F40 | 217.7 | 76.9 | 65.3 | 120.0 | 120.4 | 146.6 | 152.4 | 0.12 |
| L41 | 225.0 | 87.6 | 44.2 | 118.9 | 119.8 | 159.1 | 180.8 | 0.41 |
| E42 | 227.3 | 79.4 | 48.0 | 118.2 | 112.6 | 163.6 | 179.3 | 0.29 |
| E43 | 216.2 | 85.0 | 55.6 | 118.9 | 118.3 | 145.9 | 160.6 | 0.30 |
| H44 | 222.3 | 81.9 | 39.5 | 114.6 | 120.4 | 161.6 | 182.7 | 0.39 |
| G46 | 198.2 | 78.7 | 31.2 | 102.7 | 110.3 | 143.2 | 167.0 | 0.50 |
| E48 | 236.9 | 81.6 | 45.0 | 121.2 | 121.6 | 173.6 | 191.9 | 0.32 |
| V50 | 240.9 | 81.7 | 54.2 | 125.6 | 112.7 | 173.0 | 186.7 | 0.24 |
| L51 | 217.8 | 81.6 | 46.2 | 115.2 | 116.5 | 154.0 | 171.6 | 0.34 |
| R52 | 230.8 | 84.7 | 55.6 | 123.7 | 119.1 | 160.7 | 175.2 | 0.27 |
| E53 | 243.2 | 76.6 | 61.9 | 127.2 | 116.7 | 174.0 | 181.3 | 0.13 |
| Q54 | 230.0 | 78.2 | 55.0 | 121.1 | 112.9 | 163.4 | 175.0 | 0.21 |
| A55 | 243.3 | 83.8 | 72.8 | 133.3 | 121.3 | 165.0 | 170.6 | 0.10 |
| G56 | 234.5 | 83.9 | 46.1 | 121.5 | 111.3 | 169.5 | 188.4 | 0.33 |
| G57 | 207.4 | 76.4 | 25.9 | 103.3 | 105.3 | 156.2 | 181.5 | 0.48 |
| D58 | 248.2 | 90.6 | 46.1 | 128.3 | 117.7 | 179.8 | 202.0 | 0.37 |
| A59 | 217.0 | 99.0 | 48.7 | 121.6 | 129.1 | 143.1 | 168.3 | 0.53 |
| T60 | 251.2 | 73.3 | 72.9 | 132.5 | 117.6 | 178.1 | 178.3 | 0.00 |
| E61 | 232.1 | 74.8 | 40.7 | 115.9 | 119.6 | 174.4 | 191.4 | 0.29 |

|      |       |       |      |       |       |       |       |      |
|------|-------|-------|------|-------|-------|-------|-------|------|
| N62  | 227.9 | 99.7  | 54.3 | 127.3 | 116.4 | 150.9 | 173.6 | 0.45 |
| F63  | 215.9 | 85.9  | 50.0 | 117.2 | 118.3 | 147.9 | 165.9 | 0.36 |
| E64  | 232.9 | 74.2  | 57.6 | 121.6 | 120.4 | 167.0 | 175.3 | 0.15 |
| D65  | 233.7 | 91.0  | 45.9 | 123.5 | 121.7 | 165.2 | 187.8 | 0.41 |
| H68  | 211.8 | 104.3 | 25.0 | 113.7 | 120.2 | 147.1 | 186.7 | 0.81 |
| T70  | 218.4 | 65.9  | 41.9 | 108.7 | 117.0 | 164.5 | 176.5 | 0.22 |
| D71  | 245.2 | 82.3  | 49.3 | 125.6 | 122.0 | 179.4 | 195.9 | 0.28 |
| A72  | 221.4 | 83.2  | 50.2 | 118.3 | 124.9 | 154.7 | 171.2 | 0.32 |
| R73  | 212.4 | 91.1  | 34.9 | 112.8 | 119.7 | 149.5 | 177.6 | 0.56 |
| E74  | 253.8 | 72.8  | 59.5 | 128.7 | 123.6 | 187.7 | 194.3 | 0.11 |
| S76  | 227.3 | 75.4  | 41.4 | 114.7 | 115.1 | 168.9 | 185.8 | 0.30 |
| K77  | 231.9 | 85.9  | 46.8 | 121.5 | 120.4 | 165.5 | 185.1 | 0.35 |
| T78  | 224.4 | 67.8  | 49.4 | 113.9 | 110.0 | 165.8 | 175.0 | 0.17 |
| F79  | 238.2 | 72.4  | 62.8 | 124.5 | 118.4 | 170.6 | 175.5 | 0.09 |
| I81  | 237.9 | 89.1  | 38.4 | 121.8 | 120.0 | 174.1 | 199.5 | 0.44 |
| G82  | 215.0 | 70.0  | 30.1 | 105.1 | 111.0 | 164.9 | 184.9 | 0.36 |
| E83  | 236.4 | 84.9  | 59.5 | 126.9 | 118.7 | 164.2 | 176.9 | 0.23 |
| L84  | 232.5 | 94.8  | 50.7 | 126.0 | 123.3 | 159.8 | 181.8 | 0.41 |
| H85  | 221.6 | 116.1 | 34.4 | 124.0 | 130.8 | 146.4 | 187.2 | 0.84 |
| S93  | 214.9 | 81.7  | 39.8 | 112.1 | 115.9 | 154.1 | 175.1 | 0.41 |
| K94  | 230.8 | 94.2  | 31.3 | 118.7 | 124.6 | 168.0 | 199.5 | 0.56 |
| M96  | 219.2 | 87.9  | 45.4 | 117.5 | 121.7 | 152.6 | 173.9 | 0.42 |
| E97  | 228.8 | 71.6  | 56.2 | 118.9 | 122.8 | 164.9 | 172.6 | 0.14 |
| T98  | 226.6 | 78.6  | 57.2 | 120.8 | 116.6 | 158.6 | 169.3 | 0.20 |
| I100 | 215.3 | 102.7 | 39.5 | 119.2 | 123.4 | 144.2 | 175.8 | 0.66 |
| T101 | 226.6 | 93.7  | 32.1 | 117.5 | 119.1 | 163.7 | 194.5 | 0.56 |
| T102 | 214.3 | 79.6  | 34.7 | 109.5 | 117.6 | 157.2 | 179.6 | 0.43 |

---

**Table S3.** Parallel ( $\delta_{||}$ , ppm) and perpendicular ( $\delta_{\perp}$ , ppm) components of experimentally measured amide- $^{15}\text{N}$  CSA derived using the relations  $(3\delta_{\text{iso}} + 2\text{CSA})/3$  and  $(3\delta_{\text{iso}} - \text{CSA})/3$ , respectively for alpha-helix and beta-sheet residues of cytb<sub>5</sub>. The experimental CSA for backbone amide residues were obtained by assuming axially symmetric CSA tensors for an effective internuclear distance  $r_{\text{N-H}} = 1.023 \text{ \AA}$  and a constant angle  $\beta = 18^\circ$  that least shielded component ( $\delta_{11}$ ) of CSA tensor makes with the N-H bond vector.<sup>1</sup>

| Residue | $\delta_{  }$ | $\delta_{\perp}$ | Residue | $\delta_{  }$ | $\delta_{\perp}$ |
|---------|---------------|------------------|---------|---------------|------------------|
| K10     | 267.4         | 57.3             | Q54     | 274.7         | 32.0             |
| Y11     | 229.9         | 67.8             | G56     | 204.6         | 64.7             |
| Y12     | 240.1         | 57.4             | G57     | 191.2         | 62.3             |
| L14     | 229.5         | 70.3             | D58     | 243.9         | 54.6             |
| E15     | 242.9         | 53.7             | T60     | 238.1         | 57.4             |
| E16     | 221.8         | 67.5             | E61     | 279.1         | 39.8             |
| I17     | 267.3         | 48.1             | N62     | 237.6         | 55.9             |
| K18     | 237.6         | 55.9             | F63     | 245.6         | 54.7             |
| K19     | 236.2         | 53.3             | E64     | 250.7         | 55.2             |
| H20     | 227.8         | 68.8             | D65     | 254.1         | 55.5             |
| W27     | 263.8         | 58.8             | T70     | 211.1         | 70.0             |
| L28     | 224.6         | 62.0             | D71     | 249.6         | 58.2             |
| I29     | 212.7         | 74.9             | A72     | 244.0         | 65.4             |
| V34     | 222.2         | 70.2             | R73     | 242.9         | 58.0             |
| Y35     | 256.1         | 61.6             | E74     | 280.0         | 45.4             |
| L41     | 261.2         | 49.1             | S76     | 228.7         | 58.3             |
| E42     | 243.8         | 47.1             | K77     | 243.2         | 58.9             |
| E43     | 275.1         | 39.9             | T78     | 196.4         | 66.8             |
| E48     | 239.2         | 62.7             | F79     | 218.8         | 68.1             |
| V50     | 244.5         | 46.9             | I81     | 247.7         | 56.1             |
| L51     | 253.4         | 48.1             | G82     | 204.6         | 64.2             |
| R52     | 280.3         | 38.5             | E83     | 223.2         | 66.5             |

## REFERENCES

(1) Pandey, M. K.; Vivekanandan, S.; Ahuja, S.; Pichumani, K.; Im, S. C.; Waskell, L.; Ramamoorthy, A. *J. Phys. Chem. B* **2012**, *116*, 7181

The complete author list of reference no. 85 in the main article.

Frisch, M. J.; Trucks, G. W.; Schlegel, H. B.; Scuseria, G. E.; Robb, M. A.; Cheeseman, J. R.; Montgomery, J. A., Jr.; Vreven, T.; Kudin, K. N.; Burant, J. C.; Millam, J. M.; Iyengar, S. S.; Tomasi, J.; Barone, V.; Mennucci, B.; Cossi, M.; Scalmani, G.; Rega, N.; Petersson, G. A.; Nakatsuji, H.; Hada, M.; Ehara, M.; Toyota, K.; Fukuda, R.; Hasegawa, J.; Ishida, M.; Nakajima, T.; Honda, Y.; Kitao, O.; Nakai, H.; Klene, M.; Li, X.; Knox, J. E.; Hratchian, H. P.; Cross, J. B.; Bakken, V.; Adamo, C.; Jaramillo, J.; Gomperts, R.; Stratmann, R. E.; Yazyev, O.; Austin, A. J.; Cammi, R.; Pomelli, C.; Ochterski, J. W.; Ayala, P. Y.; Morokuma, K.; Voth, G. A.; Salvador, P.; Dannenberg, J. J.; Zakrzewski, V. G.; Dapprich, S.; Daniels, A. D.; Strain, M. C.; Farkas, O.; Malick, D. K.; Rabuck, A. D.; Raghavachari, K.; Foresman, J. B.; Ortiz, J. V.; Cui, Q.; Baboul, A. G.; Clifford, S.; Cioslowski, J.; Stefanov, B. B.; Liu, G.; Liashenko, A.; Piskorz, P.; Komaromi, I.; Martin, R. L.; Fox, D. J.; Keith, T.; Al-Laham, M. A.; Peng, C. Y.; Nanayakkara, A.; Challacombe, M.; Gill, P. M. W.; Johnson, B.; Chen, W.; Wong, M. W.; Gonzalez, C.; Pople, J. A. *Gaussian 03 (Revision C.2)*. Wallingford CT: Gaussian, Inc.; **2004**.
